1 High genetic diversity and low differentiation in mud crab (*Scylla*  
2 *paramamosain*) along southeastern coast of China revealed by  
3 microsatellite markers

4 Hongyu Ma, Haiyu Cui, Chunyan Ma, Lingbo Ma

5 Key Laboratory of East China Sea and Oceanic Fishery Resources Exploitation, Ministry of  
6 Agriculture, East China Sea Fisheries Research Institute, Chinese Academy of Fishery  
7 Sciences, Shanghai, 200090, China

8 Correspondence: Lingbo Ma. Tel: 0086-21-65809298. Email: malingbo@vip.sina.com

9 **Abstract:** Mud crab (*Scylla paramamosain*) is a carnivorous portunid crab, mainly distributed  
10 along southeastern coast of China. Mitochondrial DNA analysis in previous study indicated a  
11 high level of genetic diversity and low differentiation of it. In this study, population genetic  
12 diversity and differentiation of *S. paramamosain* were investigated using nine microsatellite  
13 markers. In total, 397 wild specimens of 11 locations from southeastern coast of China were  
14 sampled and genotyped. A high level of genetic diversity was observed, with  $N_a$ ,  $H_O$  and  $H_E$   
15 per location ranging from 7.8 to 9.6, from 0.62 to 0.77 and from 0.66 to 0.76, respectively.  
16 AMOVA analysis indicated a low level of genetic differentiation among 11 locations, despite  
17 that a statistically significant  $F_{ST}$  value was found ( $F_{ST}=0.0183$ ,  $P<0.05$ ). Out of 55 pairwise  
18 location comparisons, 39 showed significant  $F_{ST}$  values ( $P<0.05$ ), but all of them were lower  
19 than 0.05, except one between SM and ST locations. No significant deficiency of  
20 heterozygotes ( $F_{IS}=0.0007$ ,  $P>0.05$ ) was detected for all locations except SM and ZJ. Cluster  
21 analysis using UPGMA showed that all locations fell into one group except SM. Significant  
22 association was found between genetic differentiation in terms of  $F_{ST}/(1-F_{ST})$  and natural  
23 logarithm of geographical distance ( $r^2=0.1139$ ,  $P=0.02$ ), indicating that the genetic variation  
24 pattern closely resembled an isolation by distance model. This study supports the viewpoint of  
25 high genetic diversity and low differentiation in *S. paramamosain* along southeastern coast of  
26 China.

27 **Key words:** *Scylla paramamosain*, microsatellites, genetic diversity, genetic differentiation

28 **Running title:** Genetic diversity of *Scylla paramamosain*

## 29 **Introduction**

30 Mud crab (*Scylla paramamosain*), mainly distributed along southeastern coast of China, is a  
31 commercially important crab resource for fisheries and aquaculture. Records of *S.*  
32 *paramamosain* aquaculture can date back more than 100 years in China (Shen and Lai, 1994)  
33 and more than 30 years in other Asian countries (Keenan and Blackshaw, 1999). In wild  
34 environments, adults mate inshore and then gravid females generally migrate offshore and  
35 spawn their eggs (Perrine, 1979). Due to over-exploitation and environmental deterioration,  
36 the wild resource decreased quickly. In order to conserve and sustainably exploit this  
37 important crab resource, genetic studies are necessary, as they are helpful for better  
38 understanding genetic diversity and structure (Dickerson et al., 2010), investigation of  
39 phylogenetic and evolutionary history (Gvozdik et al., 2010; Van Syoc et al., 2010), and can  
40 also provide constructive guidance for resource conservation and management  
41 (Ortega-Villaizan et al., 2006). For *S. paramamosain*, mtDNA has been studied and the result  
42 suggested a genetically homogeneous population structure and a recent population expansion  
43 event (He et al., 2010). Moreover, a high level of genetic diversity and low differentiation of  
44 different locations were observed in *S. paramamosain* inhabited along southeastern coast of  
45 China using mtDNA also (Lu et al., 2009; Ma et al., 2011a).

46 Microsatellites are nuclear molecular markers with the characteristics of 1 to 6 bp length  
47 repeat motif, high polymorphism and codominant inheritance. Microsatellite markers have  
48 been widely used for investigation of genetic diversity (Dudaniec et al., 2010), determination  
49 of pedigree (Li et al., 2009a), construction of genetic maps (Ma et al., 2011b) and mapping of  
50 QTLs (Zhang et al., 2011). To date, microsatellite markers have been isolated in *S.*

51 *paramamosain* (Takano et al., 2005; Ma et al., 2010, 2011c; Cui et al., 2011), but no  
52 references about population genetic diversity and differentiation are reported for this  
53 important crab species.

54 In this study, a total of 397 wild specimens of 11 locations from southeastern coast of China  
55 were sampled and genotyped using nine microsatellite markers. The purpose is to investigate  
56 the level of population genetic diversity and differentiation in *S. paramamosain* across these  
57 regions to provide valuable information for conservation, exploitation and management of this  
58 important fishery resource.

59

## 60 **Materials and Methods**

### 61 **Sample collection and DNA extraction**

62 A total of 397 wild specimens of *S. paramamosain* were collected from 11 different  
63 locations along southeastern coastal regions of China: Sanmen (SM,  $N=38$ ), Ningde (ND,  
64  $N=35$ ), Zhangzhou (ZZ,  $N=32$ ), Shantou (ST,  $N=25$ ), Shenzhen (SZ,  $N=40$ ), Zhanjiang (ZJ,  
65  $N=41$ ), Haikou (HK,  $N=37$ ), Wenchang (WC,  $N=51$ ), Wanning (WN,  $N=35$ ), Dongfang (DF,  
66  $N=30$ ) and Danzhou (DZ,  $N=33$ ) (Fig. 1 and Table 1). Each specimen was euthanized by  
67 administering a lethal dose of MS-222. Genomic DNA was extracted from muscle tissue  
68 using traditional proteinase K and phenol-chloroform extraction protocols as described by Ma  
69 et al. (2009a). The DNA was adjusted to 100 ng/ $\mu$ l concentration and stored at  $-20^{\circ}\text{C}$  until use.

### 70 **Microsatellite genotyping**

71 Nine polymorphic microsatellite loci were selected for genotyping, of which eight were  
72 developed using 5' anchored PCR method (Cui et al., 2011), while the other one was

73 developed using PCR-based isolation of microsatellite arrays (PIMA) (Ma et al., 2010) in our  
74 laboratory (Table 2). The criteria for selection are as follows: the annealing temperature  
75 within 50–63 °C, the expected product size between 110 and 320 bp, the observed  
76 heterozygosity value > 0.5, and no stuttering bands. PCR reactions were conducted in a total  
77 volume of 25 µl and included 0.4 µM each primer, 0.2 mM each dNTP, 1×PCR buffer, 1.5  
78 mM MgCl<sub>2</sub>, 0.75 unit *Taq* polymerase, and approximately 100 ng template DNA under the  
79 following conditions: one cycle of denaturation at 94°C for 4 min; 30 cycles of 30s at 94°C,  
80 50s at a primer-specific annealing temperature (Table 2), and 50s at 72°C. As a final step,  
81 products were extended for seven min at 72°C.

82 Several methods such as agarose gel electrophoresis, denaturing polyacrylamide gel  
83 electrophoresis, and automated DNA sequencing were often employed for detecting  
84 differences of nucleotide acid, of which the second one is a very effective and practical  
85 technique for genotyping of microsatellites and has been used in a wide range of organisms,  
86 as it has many advantages: the high resolution (about 1 bp) and large outputs (100 samples for  
87 one time), the low expenses, and can be easily mastered. In this study, the PCR products were  
88 separated on 6% denaturing polyacrylamide gel as described by Ma (2009b). The  
89 microsatellite fragments were visualized by silver-staining which was performed as follows:  
90 the gel was soaked in 1.0 L staining solution (1.5g AgNO<sub>3</sub>) for about 10 min. After dropping  
91 the solution, the gel was washed by ddH<sub>2</sub>O for 5 s. Then the gel was soaked in 1.0 L coloured  
92 solution (20 g NaOH and 4 ml formaldehyde) for about 10 min. Finally, the gel was cleaned  
93 by ddH<sub>2</sub>O. The sizes of alleles were estimated according to the pBR322/*Msp* I marker.

#### 94 **Data analysis**

95 Observed and expected heterozygosity, departure from Hardy-Weinberg equilibrium (HWE),  
96 linkage disequilibrium (LD) and inbreeding coefficient ( $F_{IS}$ ) were performed using  
97 ARLEQUIN version 3.01 software (Excoffier et al., 2005). Genetic differentiation among  
98 locations was estimated using the analysis of molecular variance (AMOVA) approach by  
99 GENALEX version 6.41 software (Peakall and Smouse, 2006). The significance levels were  
100 tested by 10000 permutations for LD and by 1000 permutations for  $F_{ST}$  values. Observed  
101 number of alleles ( $N_a$ ), effective number of alleles ( $N_e$ ) and genetic distance were estimated  
102 using POPGENE version 1.31 software (Yeh et al., 1999). An unweighted pair-group mean  
103 analysis (UPGMA) tree was constructed based on Nei's genetic distance (Nei, 1978) of  
104 pairwise locations using MEGA version 4.0 software (Tamura et al., 2007). The association  
105 between genetic differentiation and geographic distance (isolation by distance) among  
106 locations was estimated by Mantel test (Mantel, 1967) with 1000 permutations.

107

## 108 **Results**

109 All nine microsatellite loci used in this study were polymorphic in each location, showing a  
110 high level of genetic diversity (Table 3). In total, 104 alleles were detected from 397  
111 individuals in 11 locations across nine loci. Observed number of alleles ( $N_a$ ) ranged from six  
112 (Scypa1) to 16 (Scypa8 and Scpa03) per locus and from 7.8 (ST) to 9.6 (WC) per location.  
113 Observed and expected heterozygosity ( $H_O$  and  $H_E$ ) ranged from 0.32 to 1.00 and from 0.31 to  
114 0.93 per locus-location combination, while from 0.62 (SM) to 0.77 (HK) and from 0.66 (ST)  
115 to 0.76 (ND and DZ) per location, respectively. The inbreeding coefficient ( $F_{IS}$ ) ranged from  
116 -0.278 to 0.440 per locus-location combination and from -0.137 (ST) to 0.136 (SM) per

117 location, with an average of 0.001 as a whole.

118 An exact probability test of Hardy-Weinberg equilibrium (HWE) was performed among 99  
119 locus-location combinations, and it revealed a significant deviation at 19 loci ( $P < 0.05$ ). These  
120 19 loci were Scypa1 (in ZZ and HK), Scypa2 (in SM and ZJ), Scypa3 (in ND and ST),  
121 Scypa4 (in DF), Scypa8 (in ND, ZZ, HK and WN), Scypa13 (in SM, ST, ZJ and WN) and  
122 Scypa03 (in SM, SZ, ZJ and WC), respectively. Two loci (Scypa5 and Scypa11) were in  
123 keeping with HWE in all locations. Probability tests of genotypic linkage disequilibrium (LD)  
124 for all pairs of loci within each location suggested significant nonrandom associations in only  
125 one of 396 possible pairwise comparisons after sequential Bonferroni correction (Scypa2 and  
126 Scypa13 in DF,  $P < 0.00139$ ) (Rice, 1989). When each location was analyzed separately, there  
127 was no evidence for stuttering and large allelic dropout in any of the loci confirmed by  
128 MICRO-CHECKER version 2.2.3 software (Van Oosterhout et al., 2004).

129 The analysis of molecular variance (AMOVA) showed that genetic variation existed mainly  
130 within locations, rather than among locations, as the percentage of variance was 98.17%  
131 within locations, while 1.83% among locations. Although the overall  $F_{ST}$  value over all  
132 locations and loci was statistically significant ( $F_{ST} = 0.0183$ ,  $P < 0.05$ ), the genetic  
133 differentiation was still low, because the  $F_{ST}$  values were much lower than 0.05 (Table 4 and  
134 Table 5). Multilocus estimates of  $F_{ST}$  for all possible pairwise locations ranged from 0.002 (ZJ  
135 and DZ) to 0.067 (SM and ST). The highest differentiation was between SM and ST  
136 ( $F_{ST} = 0.067$ ), and the lowest differentiation was between ZJ and DZ (Table 5). Thirty-nine out  
137 of 55 pairwise locations showed significant differentiation ( $P < 0.05$ ). Nei's genetic distances  
138 between pairwise locations ranged from 0.0121 (ZZ and SZ) to 0.2036 (SM and ST), and they

139 were lower than 0.1 between 43 out of total 55 pairwise locations. Among 11 locations, SM  
140 was the most distinctive one, as it showed significant differentiation to all other 10 locations  
141 ( $F_{ST}$  values ranged from 0.024 to 0.067). In contrast, DZ was the most representative one as it  
142 significantly differed only to four locations ( $F_{ST}$  values ranged from 0.012 to 0.029).

143 Cluster analysis of 11 locations using UPGMA approach revealed two groups: one  
144 contained 10 locations and the other contained only one location (SM) (Fig. 2). Mantel tests  
145 for isolation by distance among locations detected a significant positive correlation between  
146 pairwise  $F_{ST}/(1 - F_{ST})$  and the natural logarithm of geographic distance (km) ( $r^2=0.1139$ ,  
147  $P=0.02$ ), while no significant correlation between pairwise  $F_{ST}$  and geographic distance (km)  
148 ( $r^2=0.1230$ ,  $P=0.06$ ) (Fig. 3)

149

## 150 **Discussion**

151 This study suggested a high level of population genetic diversity of *S. paramamosain* along  
152 southeastern coast of China ( $N_a$ ,  $H_O$  and  $H_E$  ranged from 7.8 to 9.6, from 0.62 to 0.77 and  
153 from 0.66 to 0.76 per location respectively) that is in accord with the previous studies which  
154 showed a high level of mtDNA genetic diversity in *S. paramamosain* (Lu et al., 2009; Ma et  
155 al., 2011a). High population genetic diversity also has been observed in other marine animals,  
156 such as scallop (*Chlamys farreri*) (Zhao et al., 2009), Atlantic salmon (*Salmo salar*) (Karlsson  
157 et al., 2010) and silver pomfret (*Pampus argenteus*) (Zhao et al., 2011). Three factors  
158 including the life history characteristics, environmental heterogeneity and large population  
159 sizes may help to maintain a high level of genetic diversity (Perrine, 1979; Nei, 1987; Avise,  
160 1998). On the whole, the level of genetic diversity of *S. paramamosain* from the southern

161 regions was higher than that from the northern regions (Table 3) that may be due to the  
162 different inhabitation environments. A similar finding was observed in previous study which  
163 indicated a reduction trend for genetic diversity of *S. paramamosain* from south to north step  
164 by step using mtDNA (Lu et al., 2009).

165 Generally, marine fishes are considered to have low level of genetic differentiation among  
166 different geographic populations due to the high dispersal capabilities, large population sizes  
167 and relatively small barriers in the marine environment (Beheregaray and Sunnucks, 2001).  
168 For fish *Nibea albiflora*, little population genetic structure between Yellow Sea and East  
169 China Sea was observed using mtDNA (Han et al., 2008). For shrimp *Fenneropenaeus*  
170 *chinensis*, no significant population genetic differentiation between Yellow Sea and Bohai Sea  
171 was found using both microsatellite DNA and mtDNA (Liu et al., 2004; Li et al., 2009b). For  
172 the crab *S. paramamosain*, a genetically homogeneous population structure with high gene  
173 flow was observed among most localities along the coasts of East China Sea and South China  
174 Sea using mtDNA (He et al., 2010). In this study, statistically significant genetic  
175 differentiation was detected among 11 locations along southeastern coast of China  
176 ( $F_{ST}=0.0183$ ,  $P<0.05$ ), but the  $F_{ST}$  value was still low ( $<0.05$ ), suggesting a low level of  
177 genetic differentiation (Wright, 1978). A similar finding was reported in earlier studies which  
178 suggested a low differentiation in *S. paramamosain* by mtDNA (Lu et al., 2009; He et al.,  
179 2010; Ma et al., 2011a). The above information indicated that all locations of *S.*  
180 *paramamosain* should be a single genetically homogeneous population. Low  $F_{ST}$  value  
181 indicated the relatively high gene flow among locations. There are three most likely  
182 explanations: the unique reproductive habit that adult and juvenile migrate between ocean



183 basins and adjacent continental margins, the high dispersal capabilities of larvae, and the  
184 small limits of physical barriers in the marine environment.

185 Among these 11 locations, SM was the most genetically distinctive one in two main ways:  
186 (1) it has the lowest genetic diversity (the overall  $H_O$  was 0.62) and the highest  $F_{ST}$  values (the  
187 ranges between 0.024 and 0.067) compared with other locations; (2) it has the greatest overall  
188  $F_{IS}$  value ( $F_{IS}=0.136$ ,  $P<0.05$ ) compared with other locations. These findings indicated that  
189 the gene exchange is relatively lower between SM and other locations than that between other  
190 location-pairs. Naturally, the optimum temperature range of this crab is from 18 to 27°C for  
191 growth, and the relatively higher temperature is needed for spawning. However, SM is the  
192 most northern one among these locations, so the seawater temperature is the lowest in the  
193 same period. Low temperature may limit the effective population size and the high dispersal  
194 capabilities of *S. paramamosain*. Moreover, the over-fishing of human may be another  
195 potentially reason. The significant positive correlation between genetic differentiation and  
196 geographic distance was found, suggesting an isolation by distance model of genetic  
197 variation.

198 In conclusion, a high level of population genetic diversity and low differentiation were  
199 found in mud crab (*Scylla paramamosain*) from 11 locations along southeastern coastal  
200 regions of China by microsatellites analysis that showed a genetically homogeneous  
201 population structure of these 11 locations of *S. paramamosain*. In the future, more population  
202 genetic studies should be done fully in this crab species. The findings in this study will  
203 provide valuable information for conservation, exploitation, and artificial selective breeding  
204 of this important fishery resource.

205 **Acknowledgments**

206 We thank Dr. Keji Jiang for assistance in samples collection. This research was supported by  
207 the National Non-Profit Institutes (East China Sea Fisheries Research Institute) (No.  
208 2011M05), the National Natural Science Foundation of China (No. 31001106), and the  
209 Science and Technology Commission of Shanghai Municipality (No. 10JC1418600).

210

211 **References**

212 **Avise, J.** (1998). Phylogeography. Harvard University Press. Cambridge, MA.

213 **Beheregaray, L.B. and Sunnucks, P.** (2001). Fine-scale genetic structure, estuarine  
214 colonization and incipient speciation in marine silverside fish *Odontesthes argentinensis*.  
215 *Mol. Ecol.* **10**, 2849-2866.

216 **Cui, H.Y., Ma, H.Y., Ma, L.B., Ma, C.Y. and Ma, Q.Q.** (2011). Development of eighteen  
217 polymorphic microsatellite markers in *Scylla paramamosain* by 5' anchored PCR  
218 technique. *Mol. Biol. Rep.* **38** (8), 4999-5002.

219 **Dickerson, B.R., Ream, R.R., Vignieri, S.N. and Bentzen, P.** (2010). Population structure  
220 as revealed by mtDNA and microsatellites in northern fur seals, *Callorhinus ursinus*,  
221 throughout their range. *Plos One* **5** (5), 10671-10679.

222 **Dudaniec, R.Y., Storfer, A., Spear, S.F. and Richardson, J.S.** (2010). New microsatellite  
223 markers for examining genetic variation in peripheral and core populations of the coastal  
224 giant salamander (*Dicamptodon tenebrosus*). *Plos One* **5** (12), 14333-14336.

225 **Excoffier, L., Laval, G. and Schneider, S.** (2005). Arlequin (version 3.0): an integrated  
226 software package for population genetics data analysis. *Evol. Bioinform.* **1**, 47-50.

- 227 **Gvozdik, V., Moravec, J., Klutsch, C. and Kotlik, P.** (2010). Phylogeography of the Middle  
228 Eastern tree frogs (*Hyla*, Hylidae, Amphibia) as inferred from nuclear and mitochondrial  
229 DNA variation, with a description of a new species. *Mol. Phylogenet. Evol.* **55**,  
230 1146-1166.
- 231 **Han, Z.Q., Gao, T.X., Yanagimoto, T. and Sakurai, Y.** (2008). Genetic population structure  
232 of *Nibea albiflora* in the Yellow Sea and East China Sea. *Fisheries Sci.* **74**, 544-552.
- 233 **He, L., Zhang, A., Weese, D., Zhu, C., Jiang, C. and Qiao, Z.** (2010). Late Pleistocene  
234 population expansion of *Scylla paramamosain* along the coast of China: A population  
235 dynamic response to the Last Interglacial sea level highstand. *J. Exp. Mar. Biol. Ecol.* **385**,  
236 20-28.
- 237 **Karlsson, S., Moen, T. and Hindar, K.** (2010). Contrasting patterns of gene diversity  
238 between microsatellites and mitochondrial SNPs in farm and wild Atlantic salmon.  
239 *Conserv. Genet.* **11**, 571-582.
- 240 **Keenan, C. and Blackshaw, P.A.** (1999). Mud crab aquaculture and biology. ACAIR  
241 Proceedings No. 78. Watson Ferguson & Co, Australia.
- 242 **Li, M., Valimaki, K., Piha, M., Pakkala, T. and Merila, J.** (2009a). Extrapair paternity and  
243 maternity in the three-toed woodpecker, *Picoides tridactylus*: insights from  
244 microsatellite-based parentage analysis. *Plos One* **4** (11), 7895-7900.
- 245 **Li, Y.L., Kong, X.Y., Yu, Z.N., Kong, J., Ma, S. and Chen, L.M.** (2009b). Genetic diversity  
246 and historical demography of Chinese shrimp *Fenneropenaeus chinensis* in Yellow Sea and  
247 Bohai Sea based on mitochondrial DNA analysis. *Afr. J. Biotechnol.* **8** (7), 1193-1202.
- 248 **Liu, P., Meng, X.H., Kong, J., Zhuang, Z.M., Ma, C.Y. and Wang, Q.Y.** (2004). Genetic

249 diversity analysis of *Penaeus chinensis* by microsatellite DNA. *Pro. Nat. Sci.* **14** (3),  
250 333-338.

251 **Lu, X.P., Ma, L.B., Qiao, Z.G., Zhang, F.Y. and Ma, C.Y.** (2009). Population genetic  
252 structure of *Scylla paramamosain* from the coast of the Southeastern China based on  
253 mtDNA COI sequences. *J. Fish. China.* **33** (1), 15-23. (In Chinese with English abstract)

254 **Ma, H.Y., Chen, S.L., Yang, J.F., Chen, S.Q. and Liu, H.W.** (2011b). Genetic linkage maps  
255 of barfin flounder (*Verasper moseri*) and spotted halibut (*Verasper variegatus*) based on  
256 AFLP and microsatellite markers. *Mol. Biol. Rep.* **38** (7), 4749-4764.

257 **Ma, H.Y., Ma, C.Y. and Ma, L.B.** (2011a). Population genetic diversity of mud crab (*Scylla*  
258 *paramamosain*) in Hainan Island of China based on mitochondrial DNA. *Biochem. Syst.*  
259 *Ecol.* **39** (4-6), 434-440.

260 **Ma, H.Y., Ma, C.Y. and Ma, L.B.** (2011c). Identification of type I microsatellite markers  
261 associated with genes and ESTs in *Scylla paramamosain*. *Biochem. Syst. Ecol.* **39** (4-6),  
262 371-376.

263 **Ma, H.Y., Ma, C.Y., Ma, L.B. and Cui, H.Y.** (2010). Novel polymorphic microsatellite  
264 makers in *Scylla paramamosain* and cross-species amplification in related crab species. *J.*  
265 *Crustacean Biol.* **30** (3), 441-444.

266 **Ma, H.Y., Yang, J.F., Su, P.Z. and Chen, S.L.** (2009a). Genetic analysis of gynogenetic and  
267 common populations of *Verasper moseri* using SSR markers. *Wuhan Univ. J. Nat. Sci.* **14**,  
268 267-273.

269 **Ma, H.Y.** (2009b). Development of sex-specific markers and SSR markers and construction  
270 of genetic linkage maps of three important cultured marine fish species. Ph. D. thesis,

271 Ocean University of China, Qingdao, China.

272 **Mantel, N.** (1967). The detection of disease clustering and a generalized regression approach.  
273 *Cancer Res.* **27**, 209-220.

274 **Nei, M.** (1978). Estimation of average heterozygosity and genetic distance from a small  
275 number of individuals. *Genetics* **89**, 583-590.

276 **Nei, M.** (1987). Molecular evolutionary genetics. Columbia University Press. New York.

277 **Ortega-Villaizan Romo, M., Suzuki, S., Nakajima, M. and Taniguchi, N.** (2006). Genetic  
278 evaluation of interindividual relatedness for broodstock management of the rare species  
279 barfin flounder *Verasper moseri* using microsatellite DNA markers. *Fisheries Sci.* **72**,  
280 33-39.

281 **Peakall, R. and Smouse, P.E.** (2006). GENALEX 6: genetic analysis in excel. Population  
282 genetic software for teaching and research. *Mol. Ecol. Notes* **6**, 288-295.

283 **Perrine, D.** (1979). The mangrove crab on Ponape. Marine Resources Division, Ponape  
284 Eastern Caroline Islands. 88 pp.

285 **Rice, W.R.** (1989). Analyzing tables of statistical tests. *Evolution* **43**, 223-225.

286 **Shen, Y. and Lai, Q.** (1994). Present status of mangrove crab (*Scylla serrata* (Forskål))  
287 culture in China. Naga, the ICLARM Quarterly, January 1994, 28-29.

288 **Takano, M., Barinova, A., Sugaya, T., Obata, Y., Watanabe, T., Ikeda, M. and Taniguchi,**  
289 **N.** (2005). Isolation and characterization of microsatellite DNA markers from mangrove  
290 crab, *Scylla paramamosain*. *Mol. Ecol. Notes* **5**, 794-795.

291 **Tamura, K., Dudley, J., Nei, M. and Kumar, S.** (2007). MEGA 4: molecular evolutionary  
292 genetics analysis (MEGA) software version 4.0. *Mol. Biol. Evol.* **24**, 1596-1599.

- 293 **Van Oosterhout, C., Hutchinson, W.F., Wills, D.P.M. and Shipley, P.** (2004).  
294 MICRO-CHECKER: software for identifying and correcting genotyping errors in  
295 mirosatellite data. *Mol. Ecol. Notes* **4**, 535-538.
- 296 **Van Syoc, R.J., Fernandes, J.N., Carrison, D.A. and Grosberg, R.K.** (2010). Molecular  
297 phylogenetics and biogeography of *Pollicipes* (Crustacea: Cirripedia), a Tethyan relict. *J.*  
298 *Exp. Mar. Biol. Ecol.* **392**, 193-199.
- 299 **Wright, S.** (1978). Evolution and the genetics of populations. Variability within and among  
300 natural populations. Vol 4. The University of Chicago Press, Chicago.
- 301 **Yeh, F.C., Yang, R.C. and Boyle, T.** (1999). POPGENE version 1.31. Microsoft  
302 window-based freeware for population genetic analysis. Available:  
303 ([www.ualberta.ca/~fyeh/](http://www.ualberta.ca/~fyeh/)). University of Alberta and the Centre for International Forestry  
304 Research.
- 305 **Zhang, Y., Xu, P., Lu, C., Kuang, Y., Zhang, X., Cao, D., Li, C., Chang, Y., Hou, N., Li,**  
306 **H., Wang, S. and Sun, X.** (2011). Genetic linkage mapping and analysis of muscle  
307 fiber-related QTLs in common carp (*Cyprinus carpio* L.). *Mar. Biotechnol.* **13**, 376-392.
- 308 **Zhao, C., Li, Q. and Kong, L.** (2009). Inheritance of AFLP markers and their use for genetic  
309 diversity analysis in wild and farmed scallop (*Chlamys farreri*). *Aquaculture* **287**, 67-74.
- 310 **Zhao, F., Dong, Y., Zhuang, P., Zhang, T., Zhang, L. and Shi, Z.** (2011). Genetic diversity  
311 of silver pomfret (*Pampus argenteus*) in the Southern Yellow and East China Seas.  
312 *Biochem. Syst. Ecol.* **39**, 145-150.

313

314

315 **Figures Legend:**

316

317 **Figure 1:** Geographic map of southeastern coast of China. ●, sampling location; 1, Sanmen  
318 (SM); 2, Ningde (ND); 3, Zhangzhou (ZZ); 4, Shantou (ST); 5, Shenzhen (SZ); 6, Zhanjiang  
319 (ZJ); 7, Haikou (HK); 8, Wenchang (WC); 9, Wanning (WN); 10, Dongfang (DF) and 11,  
320 Danzhou (DZ).

321

322 **Figure 2:** The UPGMA tree of 11 locations of *Scylla paramamosain*. SM, Sanmen; ND,  
323 Ningde; ZZ, Zhangzhou; ST, Shantou; SZ, Shenzhen; ZJ, Zhanjiang; HK, Haikou; WC,  
324 Wenchang; WN, Wanning; DF, Dongfang and DZ, Danzhou.

325

326 **Figure 3:** Relationship between genetic differentiation and geographic distance (km) among  
327 11 locations. (a) relationship between pairwise  $F_{ST}/(1 - F_{ST})$  and the natural logarithm of  
328 geographic distance (km). (b) relationship between pairwise  $F_{ST}$  and geographic distance  
329 (km).

330

331

332

333

334

335

336

337 **Tables Caption:**

338

339 **Table 1:** Characteristics of 11 locations of *Scylla paramamosain*

340

341 **Table 2:** Characterization of nine microsatellite markers used in this study.

342

343 **Table 3:** Summary statistics of nine microsatellite markers in 11 locations of *Scylla*  
344 *paramamosain*.

345  $N_a$ , observed number of alleles;  $N_e$ , effective number of alleles;  $H_o$ , observed heterozygosity;  
346  $H_E$ , expected heterozygosity;  $P_{H-W}$ ,  $P$  values for Hardy-Weinberg equilibrium; \*, Significant  $P$   
347 value  $<0.05$ ; \*\*, Significant  $P$  value  $<0.01$ .

348

349 **Table 4:** AMOVA design and results for 11 locations of *Scylla paramamosain*.

350

351 **Table 5:** Pairwise  $F_{ST}$  (below diagonal) and genetic distance (above diagonal) among 11  
352 locations of *Scylla paramamosain*.

353 \*, Significant  $P$  value  $<0.05$ ; \*\*, Significant  $P$  value  $<0.01$ .

354

355

356

357

358



359

360

361

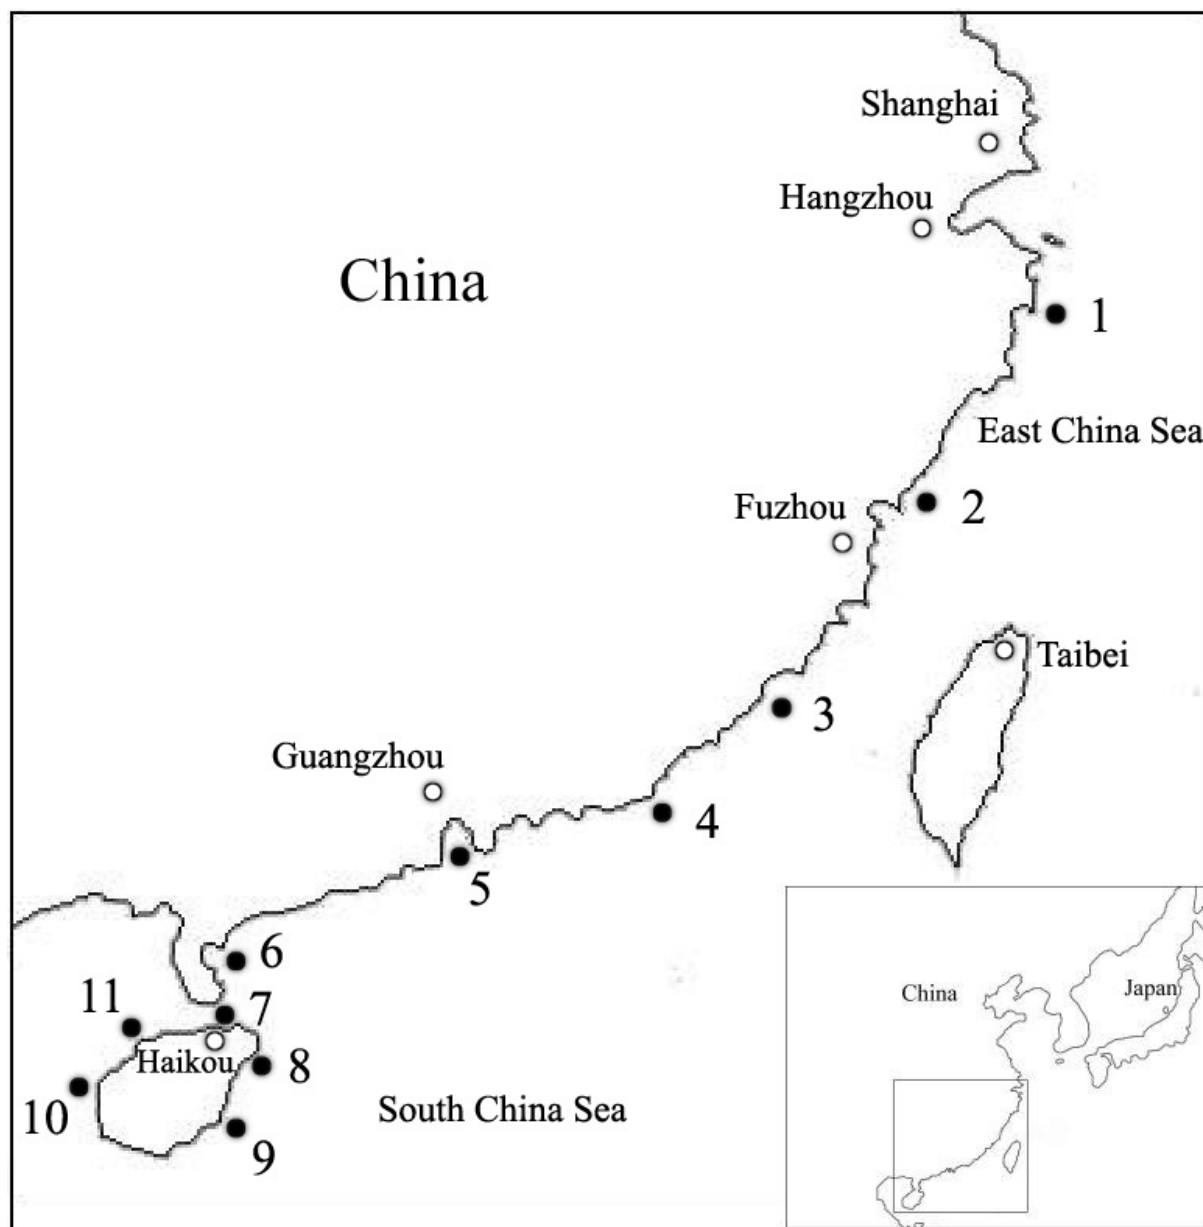

362

363 **Figure 1.** Geographic map of southeastern coast of China. •, sampling location; 1, Sanmen (SM); 2, Ningde (ND); 3,

364 Zhangzhou (ZZ); 4, Shantou (ST); 5, Shenzhen (SZ); 6, Zhanjiang (ZJ); 7, Haikou (HK); 8, Wenchang (WC); 9, Wanning

365 (WN); 10, Dongfang (DF) and 11, Danzhou (DZ).

366

367

368

369

370

371

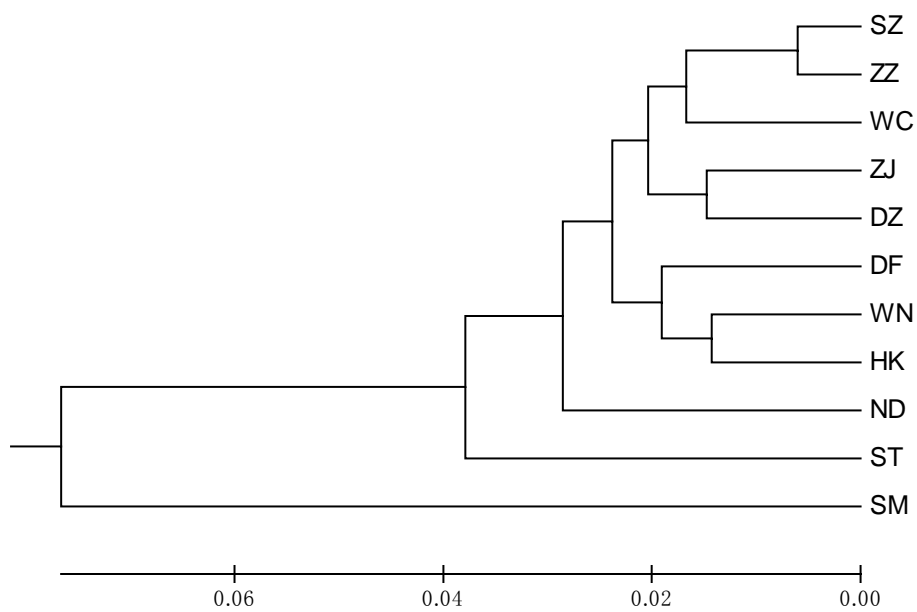

372

373 **Figure 2.** The UPGMA tree of 11 locations of *Scylla paramamosain*. SM, Sanmen; ND, Ningde; ZZ, Zhangzhou; ST,

374 Shantou; SZ, Shenzhen; ZJ, Zhanjiang; HK, Haikou; WC, Wenchang; WN, Wanning; DF, Dongfang and DZ, Danzhou.

375

376

377

378

379

380

381

382

383

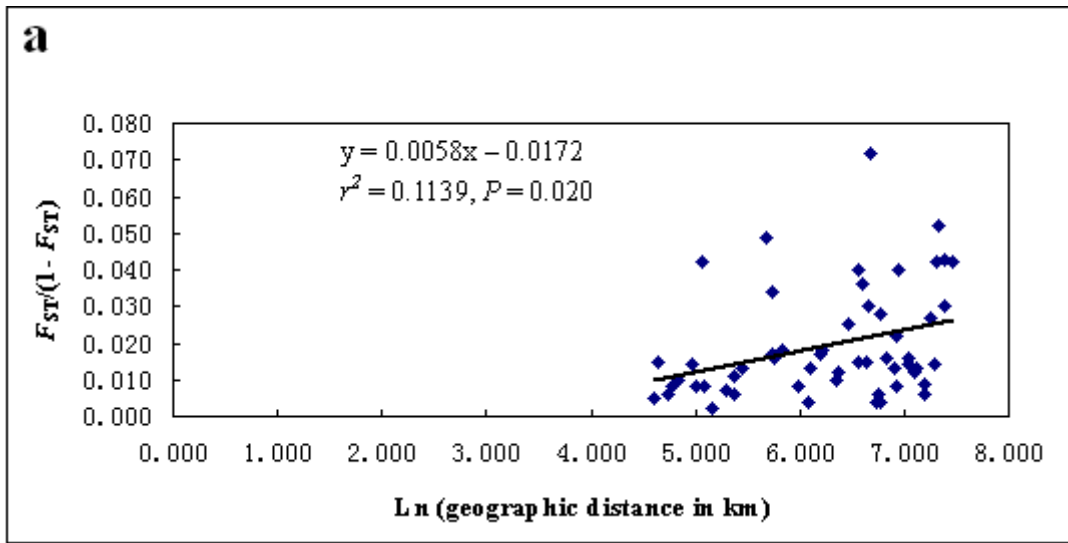

384

385

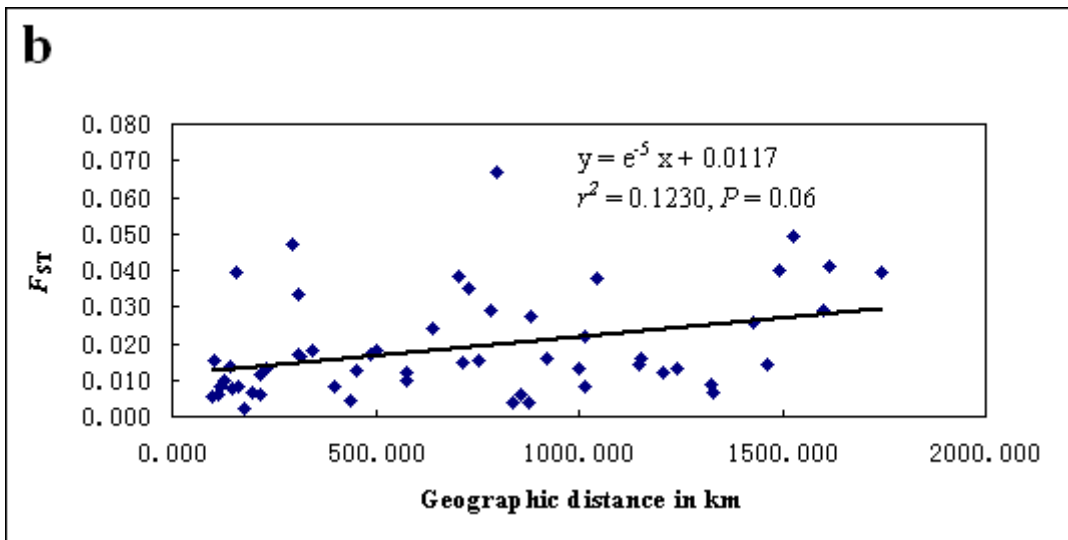

386

387 **Figure 3.** Relationship between genetic differentiation and geographic distance (km) among 11 locations. (a) relationship

388 between pairwise  $F_{ST}/(1 - F_{ST})$  and the natural logarithm of geographic distance (km). (b) relationship between pairwise  $F_{ST}$

389 and geographic distance (km).

390

391

392

393  
394  
395  
396  
397  
398  
399  
400  
401  
402  
403  
404  
405  
406  
407  
408  
409

**Table 1.** Characteristics of 11 locations of *Scylla paramamosain*

| Location  | Code | Sample size | Latitude (N) | Longitude (E) |
|-----------|------|-------------|--------------|---------------|
| Sanmen    | SM   | 38          | 29° 06"      | 122° 04"      |
| Ningde    | ND   | 35          | 26° 60"      | 120° 15"      |
| Zhangzhou | ZZ   | 32          | 24° 27"      | 118° 17"      |
| Shantou   | ST   | 25          | 23° 16"      | 116° 84"      |
| Shenzhen  | SZ   | 40          | 22° 45"      | 113° 84"      |
| Zhanjiang | ZJ   | 41          | 21° 04"      | 110° 58"      |
| Haikou    | HK   | 37          | 20° 12"      | 110° 34"      |
| Wenchang  | WC   | 51          | 19° 47"      | 110° 85"      |
| Wanning   | WN   | 35          | 18° 72"      | 110° 23"      |
| Dongfang  | DF   | 30          | 19° 26"      | 108° 30"      |
| Danzhou   | DZ   | 33          | 19° 81"      | 108° 87"      |

410

411

412

413

414

415

416 **Table 2.** Characterization of nine microsatellite markers used in this study.

| Locus   | Repeat motifs                                                                           | Primer sequences (5' – 3')                      | $T_m$ (°C) | GenBank accession no. | References            |
|---------|-----------------------------------------------------------------------------------------|-------------------------------------------------|------------|-----------------------|-----------------------|
| Scypa1  | (CTC) <sub>4</sub> TTC(CTC) <sub>2</sub>                                                | CCCTACCTACCATTACACCC<br>TATTACAAAGGACAGCCAGACA  | 54         | HM623189              | Cui et al.,<br>(2010) |
| Scypa2  | (GCA) <sub>13</sub>                                                                     | TCTGTAATCAGACCAAGGAGGT<br>CAAAATAGCCATACTGGAAGC | 53         | HM623190              |                       |
| Scypa3  | (AGT) <sub>8</sub>                                                                      | GCGGTTTCATTGCTTCG<br>GAGACTGGGTTGTCCTTA         | 53         | HM623191              |                       |
| Scypa4  | (TCC) <sub>8</sub> N <sub>26</sub> (CTG) <sub>5</sub>                                   | CTCCTGCCATCCTCATT<br>AGCGGCATCTTTGTC            | 58         | HM623192              |                       |
| Scypa5  | (TAG) <sub>6</sub> TTG(TAG) <sub>2</sub>                                                | ATAGTTGCTGGTTGATGAAG<br>GGTCTGCGGCGAAT          | 54         | HM623193              |                       |
| Scypa8  | (CT) <sub>10</sub>                                                                      | ACGAGACAGAGGGAGGC<br>GGGTTCGAGATACAAGAT         | 63         | HM623196              |                       |
| Scypa11 | (CA) <sub>17</sub> N <sub>110</sub> (GTA) <sub>5</sub>                                  | AACGCTACATCATACTGC<br>CTGTTGCTATTTCTGCTT        | 50         | HM623199              |                       |
| Scypa13 | (AGG) <sub>8</sub> N <sub>10</sub> (AGG) <sub>4</sub> N <sub>3</sub> (AGG) <sub>3</sub> | CGTCTGTCCACCCTTAG<br>CTTTCCACAACCTCGTAT         | 61         | HM623201              |                       |
| Scpa03  | (TGTA) <sub>2</sub> N <sub>5</sub> (AT) <sub>4</sub>                                    | CTGTAACACCCCAAACAT<br>GCCCAGGTACTCTCCACTC       | 52         | GU182883              | Ma et al.,<br>(2010)  |

417

418 **Table 3.** Summary statistics of nine microsatellite markers in 11 locations of *Scylla paramamosain*.

| Locus     | Sanmen (SM) | Ningde (ND) | Zhangzhou (ZZ) | Shantou (ST) | Shenzhen (SZ) | Zhanjiang (ZJ) | Haikou (HK) | Wenchang (WC) | Wanning (WN) | Dongfang (DF) | Danzhou (DZ) |
|-----------|-------------|-------------|----------------|--------------|---------------|----------------|-------------|---------------|--------------|---------------|--------------|
| Scypa1    |             |             |                |              |               |                |             |               |              |               |              |
| $N_a/N_e$ | 6.0/2.7     | 6.0/2.6     | 5.0/2.4        | 4.0/2.5      | 6.0/2.5       | 5.0/2.5        | 5.0/2.4     | 6.0/2.3       | 5.0/2.9      | 6.0/3.3       | 6.0/2.7      |
| $H_o/H_E$ | 0.54/0.64   | 0.63/0.63   | 0.47/0.60      | 0.64/0.61    | 0.65/0.62     | 0.65/0.61      | 0.67/0.59   | 0.57/0.58     | 0.59/0.66    | 0.70/0.71     | 0.67/0.63    |
| $P_{H-W}$ | 0.376       | 0.718       | 0.005**        | 0.652        | 0.157         | 0.310          | 0.046*      | 0.289         | 0.230        | 0.079         | 0.281        |
| $F_{IS}$  | 0.157       | 0.001       | 0.217          | -0.052       | -0.050        | -0.060         | -0.126      | 0.017         | 0.102        | 0.011         | -0.052       |
| Scypa2    |             |             |                |              |               |                |             |               |              |               |              |
| $N_a/N_e$ | 7.0/3.4     | 5.0/3.5     | 5.0/2.8        | 4.0/2.2      | 6.0/3.9       | 8.0/3.2        | 8.0/2.9     | 8.0/3.4       | 5.0/3.4      | 5.0/3.8       | 8.0/3.4      |
| $H_o/H_E$ | 0.47/0.72   | 0.71/0.73   | 0.56/0.66      | 0.72/0.57    | 0.68/0.75     | 0.54/0.70      | 0.74/0.67   | 0.68/0.71     | 0.79/0.72    | 0.92/0.75     | 0.76/0.72    |
| $P_{H-W}$ | 0.000**     | 0.068       | 0.405          | 0.507        | 0.331         | 0.007**        | 0.861       | 0.462         | 0.905        | 0.628         | 0.324        |
| $F_{IS}$  | 0.345       | 0.028       | 0.149          | -0.278       | 0.093         | 0.233          | -0.118      | 0.041         | -0.106       | -0.225        | -0.059       |
| Scypa3    |             |             |                |              |               |                |             |               |              |               |              |
| $N_a/N_e$ | 9.0/3.8     | 7.0/4.2     | 8.0/4.1        | 8.0/5.1      | 7.0/4.0       | 8.0/4.5        | 7.0/3.5     | 8.0/4.1       | 7.0/3.8      | 8.0/3.6       | 7.0/4.4      |
| $H_o/H_E$ | 0.59/0.75   | 0.60/0.77   | 0.63/0.77      | 0.82/0.82    | 0.83/0.76     | 0.78/0.79      | 0.60/0.72   | 0.78/0.76     | 0.63/0.75    | 0.76/0.73     | 0.84/0.79    |
| $P_{H-W}$ | 0.068       | 0.027*      | 0.129          | 0.025*       | 0.729         | 0.159          | 0.069       | 0.755         | 0.062        | 0.588         | 0.955        |
| $F_{IS}$  | 0.209       | 0.227       | 0.191          | 0.008        | -0.094        | 0.018          | 0.173       | -0.028        | 0.171        | -0.034        | -0.074       |
| Scypa4    |             |             |                |              |               |                |             |               |              |               |              |
| $N_a/N_e$ | 8.0/4.0     | 4.0/3.4     | 7.0/4.6        | 6.0/1.6      | 7.0/4.3       | 6.0/4.8        | 7.0/3.3     | 7.0/4.0       | 7.0/3.6      | 6.0/3.1       | 7.0/4.9      |
| $H_o/H_E$ | 0.73/0.76   | 0.86/0.71   | 0.81/0.80      | 0.33/0.40    | 0.67/0.78     | 0.78/0.80      | 0.75/0.71   | 0.68/0.76     | 0.68/0.73    | 0.44/0.69     | 0.78/0.81    |
| $P_{H-W}$ | 0.641       | 0.672       | 0.446          | 0.313        | 0.060         | 0.659          | 0.404       | 0.828         | 0.272        | 0.007**       | 0.827        |
| $F_{IS}$  | 0.039       | -0.205      | -0.014         | 0.173        | 0.143         | 0.032          | -0.062      | 0.104         | 0.075        | 0.357         | 0.034        |
| Scypa5    |             |             |                |              |               |                |             |               |              |               |              |
| $N_a/N_e$ | 8.0/3.1     | 7.0/2.3     | 7.0/2.8        | 4.0/1.4      | 9.0/2.4       | 9.0/2.6        | 11.0/2.7    | 10.0/3.0      | 7.0/2.0      | 10.0/2.7      | 8.0/2.3      |
| $H_o/H_E$ | 0.61/0.69   | 0.65/0.57   | 0.66/0.65      | 0.32/0.31    | 0.59/0.59     | 0.68/0.62      | 0.69/0.64   | 0.72/0.67     | 0.60/0.50    | 0.61/0.64     | 0.52/0.57    |
| $P_{H-W}$ | 0.233       | 0.538       | 0.922          | 0.331        | 0.352         | 0.379          | 0.737       | 0.820         | 0.861        | 0.139         | 0.456        |
| $F_{IS}$  | 0.121       | -0.137      | -0.015         | -0.021       | -0.006        | -0.102         | -0.084      | -0.077        | -0.188       | 0.057         | 0.099        |
| Scypa8    |             |             |                |              |               |                |             |               |              |               |              |
| $N_a/N_e$ | 12.0/5.9    | 13.0/7.2    | 10.0/5.2       | 14.0/7.0     | 11.0/5.6      | 12.0/6.2       | 11.0/5.4    | 13.0/6.1      | 11.0/6.6     | 9.0/5.0       | 15.0/7.3     |

|           |           |           |           |           |           |           |           |           |           |           |           |
|-----------|-----------|-----------|-----------|-----------|-----------|-----------|-----------|-----------|-----------|-----------|-----------|
| $H_O/H_E$ | 0.75/0.84 | 0.74/0.87 | 0.74/0.82 | 0.87/0.88 | 0.77/0.83 | 0.74/0.85 | 0.62/0.82 | 0.88/0.85 | 0.69/0.86 | 0.74/0.82 | 0.82/0.88 |
| $P_{H-W}$ | 0.297     | 0.014*    | 0.001**   | 0.756     | 0.292     | 0.206     | 0.000**   | 0.993     | 0.014*    | 0.186     | 0.463     |
| $F_{IS}$  | 0.111     | 0.154     | 0.098     | 0.008     | 0.075     | 0.127     | 0.249     | -0.038    | 0.206     | 0.093     | 0.068     |
| Scypa11   |           |           |           |           |           |           |           |           |           |           |           |
| $N_a/N_e$ | 11.0/8.3  | 11.0/8.4  | 12.0/7.8  | 10.0/6.3  | 11.0/8.1  | 11.0/8.7  | 11.0/8.5  | 11.0/5.9  | 11.0/8.8  | 10.0/6.7  | 11.0/7.0  |
| $H_O/H_E$ | 0.89/0.89 | 0.97/0.89 | 0.97/0.89 | 1.00/0.86 | 0.85/0.89 | 0.83/0.90 | 0.97/0.89 | 0.86/0.84 | 1.00/0.90 | 0.93/0.86 | 0.94/0.87 |
| $P_{H-W}$ | 0.406     | 0.644     | 0.736     | 0.887     | 0.215     | 0.544     | 0.184     | 0.808     | 0.847     | 0.628     | 0.142     |
| $F_{IS}$  | -0.004    | -0.085    | -0.096    | -0.166    | 0.042     | 0.081     | -0.088    | -0.024    | -0.113    | -0.081    | -0.078    |
| Scypa13   |           |           |           |           |           |           |           |           |           |           |           |
| $N_a/N_e$ | 6.0/1.9   | 8.0/3.4   | 7.0/1.9   | 7.0/2.3   | 9.0/2.3   | 9.0/1.9   | 8.0/4.2   | 9.0/3.2   | 7.0/2.7   | 9.0/2.1   | 8.0/3.0   |
| $H_O/H_E$ | 0.45/0.48 | 0.68/0.72 | 0.38/0.47 | 0.41/0.58 | 0.48/0.56 | 0.32/0.48 | 0.89/0.77 | 0.71/0.69 | 0.48/0.64 | 0.48/0.53 | 0.59/0.68 |
| $P_{H-W}$ | 0.048*    | 0.160     | 0.098     | 0.023*    | 0.051     | 0.002**   | 0.471     | 0.317     | 0.000**   | 0.282     | 0.189     |
| $F_{IS}$  | 0.074     | 0.062     | 0.213     | 0.299     | 0.158     | 0.339     | -0.160    | -0.022    | 0.250     | 0.099     | 0.123     |
| Scpa03    |           |           |           |           |           |           |           |           |           |           |           |
| $N_a/N_e$ | 12.0/7.9  | 15.0/9.2  | 14.0/10.7 | 13.0/10.5 | 12.0/9.7  | 11.0/9.2  | 14.0/9.4  | 14.0/10.1 | 15.0/10.2 | 13.0/9.1  | 13.0/8.9  |
| $H_O/H_E$ | 0.50/0.89 | 0.91/0.91 | 0.89/0.92 | 0.75/0.93 | 0.72/0.91 | 0.68/0.90 | 0.95/0.91 | 0.82/0.91 | 0.89/0.92 | 0.92/0.91 | 0.94/0.90 |
| $P_{H-W}$ | 0.000**   | 0.386     | 0.598     | 0.061     | 0.003**   | 0.009**   | 0.978     | 0.004**   | 0.723     | 0.075     | 0.819     |
| $F_{IS}$  | 0.440     | -0.004    | 0.034     | 0.196     | 0.212     | 0.245     | -0.045    | 0.104     | 0.028     | -0.018    | -0.040    |
| Average   |           |           |           |           |           |           |           |           |           |           |           |
| $N_a/N_e$ | 8.8/4.6   | 8.8/4.9   | 8.3/4.7   | 7.8/4.3   | 8.7/4.7   | 8.8/4.9   | 9.1/4.7   | 9.6/4.7   | 8.3/4.9   | 8.4/4.4   | 9.2/4.9   |
| $H_O/H_E$ | 0.62/0.74 | 0.75/0.76 | 0.68/0.73 | 0.65/0.66 | 0.69/0.74 | 0.67/0.74 | 0.77/0.75 | 0.74/0.75 | 0.71/0.74 | 0.72/0.74 | 0.76/0.76 |
| $F_{IS}$  | 0.136     | -0.039    | 0.052     | -0.137    | 0.021     | 0.068     | -0.048    | -0.009    | -0.030    | -0.099    | -0.020    |

419  $N_a$ , observed number of alleles;  $N_e$ , effective number of alleles;  $H_O$ , observed heterozygosity;  $H_E$ , expected heterozygosity;  $P_{H-W}$ ,  $P$  values for Hardy-Weinberg equilibrium; \*, Significant  $P$

420 value <0.05; \*\*, Significant  $P$  value <0.01

421

422

423

424 **Table 4.** AMOVA design and results for 11 locations of *Scylla paramamosain*.

| Source of variation                | df  | Sum of squares | Variance components | Percentage of variation | $F_{ST}$ |
|------------------------------------|-----|----------------|---------------------|-------------------------|----------|
| Among locations                    | 10  | 83.706         | 0.064 Va            | 1.83                    | 0.0183   |
| Among individuals within locations | 386 | 1465.290       | 0.388 Vb            | 11.18                   |          |
| Within individuals                 | 397 | 1199.000       | 3.020 Vc            | 86.99                   |          |
| Total                              | 793 | 2747.996       | 3.472               | 100                     |          |

425

426

427

428

429

430

431

432

433

434

435



436  
437  
438  
439

**Table 5.** Pairwise  $F_{ST}$  (below diagonal) and genetic distance (above diagonal) among 11 locations of *Scylla paramamosain*.

| Location | SM      | ND     | ZZ      | ST      | SZ     | ZJ     | HK     | WC     | WN     | DF     | DZ     |
|----------|---------|--------|---------|---------|--------|--------|--------|--------|--------|--------|--------|
| SM       |         | 0.1908 | 0.1058  | 0.2036  | 0.1402 | 0.1109 | 0.1954 | 0.1590 | 0.1601 | 0.1420 | 0.1245 |
| ND       | 0.047** |        | 0.0743  | 0.0585  | 0.0514 | 0.0675 | 0.0628 | 0.0563 | 0.0373 | 0.0583 | 0.0491 |
| ZZ       | 0.024** | 0.018* |         | 0.0972  | 0.0121 | 0.0356 | 0.0671 | 0.0304 | 0.0490 | 0.0407 | 0.0472 |
| ST       | 0.067** | 0.018* | 0.040** |         | 0.1006 | 0.1051 | 0.0715 | 0.0849 | 0.0453 | 0.0557 | 0.0632 |
| SZ       | 0.038** | 0.015* | 0.004   | 0.033** |        | 0.0336 | 0.0624 | 0.0364 | 0.0395 | 0.0380 | 0.0447 |
| ZJ       | 0.026** | 0.014* | 0.004   | 0.038** | 0.008  |        | 0.0687 | 0.0425 | 0.0494 | 0.0494 | 0.0295 |
| HK       | 0.049** | 0.013* | 0.016*  | 0.029** | 0.017* | 0.015* |        | 0.0354 | 0.0285 | 0.0473 | 0.0516 |
| WC       | 0.040** | 0.012* | 0.004   | 0.035** | 0.013* | 0.008  | 0.005  |        | 0.0335 | 0.0515 | 0.0406 |
| WN       | 0.041** | 0.006  | 0.013*  | 0.006   | 0.010* | 0.011* | 0.006  | 0.010* |        | 0.0289 | 0.0371 |
| DF       | 0.040** | 0.014* | 0.016*  | 0.022** | 0.015* | 0.016* | 0.013* | 0.017* | 0.007  |        | 0.0407 |
| DZ       | 0.029** | 0.009  | 0.008   | 0.027** | 0.012* | 0.002  | 0.008  | 0.006  | 0.008  | 0.014* |        |

440 \*, Significant  $P$  value <0.05; \*\*, Significant  $P$  value <0.01
